1 **Temporal, environmental, and biological drivers of the mucosal**  
2 **microbiome in a wild marine fish, *Scomber japonicus***

3  
4 Jeremiah J Minich<sup>1</sup>, Semar Petrus<sup>2</sup>, Julius D Michael<sup>2</sup>, Todd P Michael<sup>1,2</sup>, Rob Knight<sup>3,4,5</sup>, and  
5 Eric E. Allen<sup>1,3,6\*</sup>

6  
7 <sup>1</sup> Marine Biology Research Division, Scripps Institution of Oceanography, University of  
8 California, San Diego, La Jolla, CA, USA

9 <sup>2</sup> J. Craig Venter Institute, La Jolla, CA, USA

10 <sup>3</sup> Center for Microbiome Innovation, University of California San Diego, La Jolla, CA, USA

11 <sup>4</sup> Department of Pediatrics, University of California San Diego, La Jolla, CA, USA

12 <sup>5</sup> Department of Computer Science and Engineering, University of California San Diego, La  
13 Jolla, CA, USA

14 <sup>6</sup> Division of Biological Sciences, University of California, San Diego, La Jolla, CA, USA

15 \* To whom correspondence should be addressed: Eric E. Allen <[eallen@ucsd.edu](mailto:eallen@ucsd.edu)>

16

17 **Running Title:** Mackerel microbiome

18 **Keywords:** fish microbiome, mackerel, microbial ecology, microbial biogeography, *Scomber*  
19 *japonicus*

20

21

22

23

## 24 **Abstract**

25 Changing ocean conditions driven by anthropogenic activity may have a negative impact on  
26 fisheries by increasing stress and disease with the mucosal microbiome as a potentially important  
27 intermediate role. To understand how environment and host biology drives mucosal microbiomes  
28 in a marine fish, we surveyed five body sites (gill, skin, digesta, GI, and pyloric caeca) from 229  
29 Pacific chub mackerel, *Scomber japonicus*, collected across 38 time points spanning one year  
30 from the Scripps Institution of Oceanography Pier, making this the largest and longest wild  
31 marine fish microbiome survey. Mucosal sites had unique communities significantly different  
32 from the surrounding sea water and sediment communities with over 10 times more diversity  
33 than sea water alone. Although, external surfaces such as skin and gill were more similar to sea  
34 water, digesta was similar to sediment. Both alpha and beta diversity of the skin and gill was  
35 explained by environmental and biological factors, especially sea surface temperature,  
36 chlorophyll a, and fish age, consistent with an exposure gradient relationship. We verified that  
37 seasonal microbial changes were not confounded by migrations of chub mackerel sub-  
38 populations by nanopore sequencing a 14 769 bp region of the 16 568 bp mitochondria. A  
39 cosmopolitan pathogen, *Photobacterium damsela*, was prevalent across multiple body sites all  
40 year, but highest in the skin, GI, and digesta between June and September. Our study evaluates  
41 the extent which the environment and host biology drives mucosal microbial ecology,  
42 establishing a baseline for long term monitoring surveys for linking environment stressors to  
43 mucosal health of wild marine fish.

44

## 45 **Introduction**

46  
47 Pacific chub mackerel, *Scomber japonicus* (Houtuyn 1782), is an economically and ecologically  
48 important, cosmopolitan, marine coastal-pelagic fish found in the temperate and tropical waters  
49 of the Pacific, Atlantic, and Indian Oceans [1, 2]. *S. japonicus* is currently the fifth largest  
50 commercial fishery (purse-seine) in the world [3], processed for human consumption and animal  
51 food. Historically in the US, *S. japonicus* was a prominent commercial fishery, but has been on  
52 the decline since the 1980s due to a collapse in spawning and fishery stock biomass leading to  
53 the last US mackerel canary closing in 1992 [4]. The boom and busts of the fishery have been  
54 attributed to large scale environmental factors such as Pacific decadal oscillation, North Pacific  
55 gyre oscillation, sea surface temperature, sea level, upwelling, and chlorophyll *a* [5–8]. Juveniles  
56 grow quickly reaching 50% of total growth by the first 1.5 years of life with larval growth  
57 highest in warmer water (16.8 - 22.1°C) [9]. Larvae eat copepods and zooplankton [3], while  
58 juveniles and adults consume primarily small fish and pelagic crustaceans [2]. *S. japonicus* are  
59 an important prey item for marine mammals, sea birds, and higher trophic fish such as tunas and  
60 sharks [2]. In the eastern North Pacific, *S. japonicus* migrate North in the summer and South in  
61 the winter [10] with seasonal offshore migrations occurring from March to May. Climate change  
62 and warming oceans likely have contributed to stocks shifting to more northerly migrations [4].  
63 Modeling has shown that nearly 90% of the *S. japonicus* catch was explained by temperature  
64 (28-29.4°C), salinity 33.6-34.2 psu, and chlorophyll *a* of 0.15-0.5 mg/m<sup>3</sup> [8] whereas survival  
65 rates to one year recruits was highly associated with low plankton biomass [11]. *S. japonicus* are  
66 ecologically and commercially important while occupying broad environmental gradients. This  
67 combined with their relative ease of collection make them an excellent model organism to study  
68 the environmental and biological drivers of microbiome diversity in a marine vertebrate.

69

70 The primary mucosal environments of fish include the gills, skin, and throughout the  
71 gastrointestinal tract, all of which are important to fish health. Disease resistance in the host is  
72 promoted in the mucus through continual epithelial shedding and immune cell regulation [12,  
73 13]. The mucus is an important physical barrier to the environment and is generally thought to be  
74 colonized with a unique microbiome [14]. The skin and gut both have mucosal associated  
75 lymphoid tissues which produce IgT+ B cells protecting the host from invasion of mucosal  
76 microbiota [15]. The establishment of microbiomes on mucosal sites is a function of exposure  
77 and successful colonization. Mucosal environments within a fish, have varying levels of  
78 environmental exposure such as habitat (sea water, sediment, kelp forests), with gills and skin  
79 having different exposure rates than the gastrointestinal tract. The GI tract, however will have  
80 varying exposure to nutrients during digestion of food. Successful colonization within mucosal  
81 sites will further be driven by variables regulated by the host which can include different  
82 physiological conditions of the host, thus microbial communities are likely to be reflected.  
83 Various protective enzymes related to the innate immune response including lysozymes,  
84 proteases, phosphatases, esterases, and sialic acid can be differentially abundant in the mucus  
85 depending on the host fish exposure to environmental microbes [16].

86

87 To understand the full microbiome potential of a given host, it is important to evaluate the  
88 variability longitudinally throughout an entire season (year), and then to continue sampling  
89 throughout consistent periods for multiple years. Including long term biological monitoring of  
90 commercially and ecologically important marine fish to complement the 100 years of sea water  
91 data taken from the SIO pier will be important for understanding marine ecosystem dynamics.

92 Although most ecological studies since 2004 are less than a year and have sampling frequencies  
93 of 1 month or greater [17], we have designed our study to include 38 sampling frequencies  
94 across 1 year. Previous work looking at seasonal or temporal microbiome changes in the marine  
95 environment has focused on free-living pelagic seawater microbes [18]. Gilbert *et al.* found that  
96 day length described over 65% of microbial community diversity with richness highest during  
97 winter months in the North Atlantic [19]. Very few time series datasets spanning an entire year  
98 exist for analyzing the host-associated microbiome. Within humans, most seasonally-active  
99 microbes in the gut are associated with populations spending more time outdoors suggesting that  
100 seasonal variance in the environment has a greater influence on those with higher environmental  
101 exposure [20]. In freshwater fish, lower microbial diversity and altered composition in the gut  
102 was associated with warmer summer months in tilapia reared in earthen ponds [21]. In salmon  
103 however, no seasonal variations of gut microbiota composition were detected although alpha  
104 diversity was highest during warm water months [22]. To date, no systematic analysis of the  
105 temporal variability in wild fish microbiomes has been done previously.

106  
107 The purpose of this study was to quantify the effects of the environmental and biological drivers  
108 across five unique mucosal body sites in a marine fish over a longitudinal time course spanning  
109 one year. From Jan 28 2017 to Jan 26 2018, 229 pacific chub mackerel, *Scomber japonicus*, were  
110 collected off the SIO pier across 38 sampling events. Mucosal microbiome communities were  
111 sampled from five body sites including gill, skin, digesta, gastrointestinal tract, and pyloric caeca  
112 within each fish. Regional coastal sampling of sea water and marine sediment microbial  
113 communities were collected to compare mucosal communities to potential environmental  
114 sources. Microbiome processing was performed using the Earth Microbiome protocol using the

115 16S rRNA gene V4 region. Water conditions (salinity, temperature, pressure, and chlorophyll a)  
116 and fish biometrics (length, mass, condition factor, age) were collected and compared to mucosal  
117 microbiomes to determine significant ecological drivers. We evaluate both alpha diversity  
118 measures (Shannon entropy and Faith's Phylogenetic diversity) and beta diversity (weighted and  
119 unweighted UniFrac) to assess these changes. In addition, we calculate microbial gamma  
120 diversity across body sites and time to understand effects of sampling effort on capturing true  
121 host-microbiome diversity. Our results show that mucosal communities across body sites are  
122 highly differentiated in a single species of fish and that seasonal environmental drivers partially  
123 account for this differentiation.

124

125

## 126 **Materials and Methods**

127

### 128 **Sample collection *S. japonicus* time series**

129 From Jan 28 2017 to Jan 26 2018, 1-8 *Scomber japonicus* specimens were collected across 38  
130 sampling events from the end of the SIO Pier (32.867, -117.257). Sea surface water samples  
131 were collected from each sampling event and immediately stored on dry ice. Environmental  
132 conditions at time of sampling, including sea water temperature, salinity, pressure, and  
133 chlorophyll *a* concentration, were collected using publicly available data from the Southern  
134 California Coastal Ocean Observing System (SCCOOS) SIO pier shore station data archive  
135 (<http://www.sccoos.org>) (Fig 1a). Fishing occurred at or near sunset with exact times recorded in  
136 the metadata (see Qiita Study ID 11721 for full metadata). Fish were caught using hook and line  
137 with a Sabiki rig, immediately euthanized upon landing using accepted protocols according to

138 AVMA guidelines and stored on dry ice. Individual fish were wrapped in aluminum foil and  
139 handled with gloves prior to storage on dry ice to minimize contamination and then stored long  
140 term at  $-80^{\circ}\text{C}$  for up to 6 months prior to dissection. Upon processing, frozen fish were weighed  
141 and measured, along with calculation of Fulton's condition factor, which is a proxy for fish  
142 health [23, 24]. Age was estimated using fish length as derived from the most recent Pacific chub  
143 mackerel stock assessment [4] (Fig 1b-c) [25] where otoliths were compared to 25 fish  
144 individuals per catch across multiple years (1962-2008). Specifically, the von-Bertalanffy  
145 equation was used with two separate growth coefficients:  $LA = L_{\infty} (1 - e^{-k(A-t_0)})$  where  
146  $LA$ =length at age,  $L_{\infty}$ =theoretical maximum length of fish,  $k$  = growth coefficient,  $t_0$  =  
147 theoretical age when length is 0 mm. After 30 minutes of thawing the fish, a cotton swab  
148 (Puritan, Cat #806-wc) was swiped back and forth five times along the left gill and then put  
149 directly into a 2 ml Mo Bio PowerSoil (Mo Bio, Cat # 12888) bead beating tube. The skin was  
150 also swabbed in a 3 cm x 3 cm area on the left side behind the gill and above the pectoral fin (Fig  
151 1d). After carefully dissecting the fish with a new razor blade, the last 3 cm of GI tract was  
152 cleared and the digesta sampled. This same distal portion of GI tract was cut and also sampled.  
153 Lastly, an approximate 50 mg sample of pyloric caeca was sampled from the fish and placed in a  
154 tube. The tubes were then stored at  $-80^{\circ}\text{C}$  until DNA extraction commenced. For additional  
155 environmental controls, surface seawater and sediment samples were collected across two time  
156 points (Dec 8 2017 and Jan 12 2018) at 30 coastal locations, approximately 200 m offshore,  
157 spanning 10 km throughout San Diego including soft bottom, reef, river mouth, and bay areas.

158

### 159 **Microbiome processing**

160 Samples were processed using the standard 16S rRNA gene Earth Microbiome Protocol (EMP),

161 with only slight modifications (<http://www.earthmicrobiome.org>). Specifically, genomic DNA  
162 was extracted using a hybrid approach where lysis is performed in 2 ml bead beating tubes and  
163 then cleanup performed using the KingFisher robot to reduce well to well contamination (Minich  
164 et al, in prep). The initial cell lysis steps were performed in single-tube reactions (instead of 96-  
165 well plate format) followed by transfer to plates for the standard magnetic bead cleanup on the  
166 KingFisher robots using the Mo Bio PowerMag kit (Mo Bio, Cat # 27000-4-KF) which has  
167 improved limits of detection for low biomass samples [26]. The EMP extraction procedure  
168 includes modifications including the use of RNaseA during lysis and a 10 minute incubation at  
169 65°C prior to bead beating. All sample batches had positive and negative controls included with  
170 each extraction set so that sample exclusions based on read counts could be calculated [26].  
171 Extracted gDNA was then PCR amplified using the EMP 16S V4 515f/806rB bar-coded primers  
172 [27, 28]. The miniaturized PCR method, which generates libraries at a 58% cost reduction of  
173 \$1.42 per sample, was used for all samples that included the use of the Echo-550 instrument to  
174 do triplicate 5 ul PCR reactions [29]. Amplicons were quantified using a pico green assay, and  
175 then 2 ul of each sample was equally pooled into a single tube. This final pool was then cleaned  
176 up to remove dNTPs and primer dimers using the QIAquick PCR purification kit (Qiagen, Cat#  
177 28106). Final pools contained up to 768 samples which were then sequenced on an Illumina  
178 MiSeq using a 2x150 bp strategy (300-cycles v2 kit, Illumina, San Diego, CA). Bioinformatic  
179 processing of samples occurred using Qiita [30] and QIIME 1.9.1 or QIIME 2.0 [31], with the  
180 first 150 bp read trimmed to 150 bp and processed through deblur [32], a *de novo* sOTU picking  
181 method. A phylogenetic tree of the 16S sOTU single-sequence tags was created using SEPP  
182 (SATé-Enabled Phylogenetic Placement) [33]. Rarefaction levels were empirically determined  
183 by calculating the read counts at which 90% of the reads from the DNA extraction positive



184 controls map back to the positive controls [26].

185

### 186 **Summary microbiome statistics**

187 Alpha, beta, and gamma diversity of microbial communities was measured [34]. Alpha diversity  
188 was calculated using measures of Shannon [35] and Faith's Phylogenetic Diversity [36] while  
189 beta diversity was calculated using weighted and unweighted UniFrac [37, 38] distance and  
190 visualized in Emperor [39]. Alpha and beta diversity statistical significance was tested using  
191 Kruskal-Wallis test [40]. Taxonomies were classified in Silva [41] using the Greengenes and  
192 RDP databases [42] using the following parameters: minimum identity with query sequence  
193 (0.95), number of neighbors per query sequence (10), greengenes- reference NR database, search  
194 kmer-candidates (1000), lca-quorum (0.8), search-kmer-length (10), search-kmer-mm (0),  
195 search-no-fast, reject sequences below 70%.

196

### 197 **Statistical analysis of environmental and biological drivers of fish mucosal microbiomes**

198 To evaluate the extent to which the environment and biology of the fish influences the microbial  
199 communities of the various body sites, both alpha diversity and beta diversity were analyzed.  
200 Only samples which had environmental values for all water conditions (temperature, salinity,  
201 pressure, and chlorophyll a) and biological conditions (weight, fork length, condition factor, and  
202 age) were included. Thus, some samples had to be excluded due to temporary failure of the  
203 chlorophyll *a* fluorometer instrument on the SIO pier (August 4 2017). Alpha diversity measures  
204 for each body site were independently verified and tested to ensure they met the assumptions for  
205 the General Linear Model (GLM). Specifically, to test for normally distributed residuals, sets  
206 were analyzed using the R package Library(car) [43] and run through the Shapiro-Wilk

207 Normality test [44]. To evaluate and test for homoscedasticity, the non-constant error variance  
208 test (ncvTest) commonly known as the Breusch-Pagan test was used [45]. To meet GLM criteria,  
209 the Faith's Phylogenetic Diversity samples were log-transformed. Both Shannon and Faith's PD  
210 were then processed through the GLM in R while controlling for collinearity of variables.  
211 Individual  $R^2$  values and P-values for each environmental and biological variable are reported  
212 along with total  $R^2$ , F-statistic, and P-values for all variables. Gill samples using Shannon  
213 diversity and GI samples using Faith's PD were excluded from analysis due to not meeting  
214 required assumptions of the GLM. To evaluate the effects of environmental and biological  
215 variables on beta diversity, we assessed both unweighted and weighted UniFrac for each body  
216 site independently using Adonis, a non-parametric analysis of variation method, [46] in QIIME  
217 1.9.1 [31] and Calypso [47].

218

### 219 **Validation of *Photobacterium damsela* sOTU phylogeny**

220 To validate the taxonomy assignments of five *Photobacterium* sOTUs in our dataset, we  
221 performed multiple sequence alignment (Neighbor-Joining) of a 148 bp region of the 16S rRNA  
222 gene v4 region from eight other strains. Specifically, we used default settings (nucleotide scoring  
223 200 PAM / k=2, Gap opening penalty 1.53, offset value = 0, 'nzero' where Ns have no effect on  
224 alignment score) in the MAFFT alignment tool [48, 49]. The phylogenetic tree was visualized  
225 using Phylo.io [50]. The comparison bacteria strains included: two pathogenic *Photobacterium*  
226 *spp.* isolates (*P. damsela* ATCC 33539T, Genbank X74700.1; *P. damsela*, Genbank  
227 D25308.1), four non-pathogenic *Photobacterium spp.* (*P. leiognathi* strain ATCC 25521,  
228 Genbank NR\_115541.1; *P. angustum* ATCC 25915T, Genbank X74685.1; *P. phosphoreum*  
229 strain ATCC 11040, Genbank NR\_115205.1; *P. rosenbergii* strain CC1, Genbank

230 NR\_042343.1) and two outgroup *Vibrio* species (*Vibrio pelagius* strain ATCC 25916, Genbank  
231 NR\_119059.1; *Aliivibrio fischeri* strain ATCC 7744, Genbank NR\_115204.1) which were  
232 identified from various studies [51–53].

233

### 234 **Population genetics of *S. japonicus***

235 We developed a high-throughput two fragment, mitochondrial amplicon workflow for the  
236 Oxford Nanopore long read sequencer. A total of 96 gDNA skin mucus samples, spanning 5  
237 collection months (Aug 27 2017 – Jan 26 2018) were amplified in 192 separate 10 ul PCR  
238 reactions using 1 ul gDNA, 5 ul NEB Long Amp mastermix (NEB, Cat# M0287S), and 3.4 ul  
239 molecular grade water and one of two primer combinations. The first mtDNA fragment (96 PCR  
240 reactions) used 0.4 ul of 10uM forward primer (SJ\_F1\_655: 5'-TTT CTG TTG GTG CTG ATA  
241 TTG | CAA ACC TCA CCC TCC CTT GTT-3') and 0.4 ul of 10 uM reverse primer  
242 (SJ\_R1\_7653: 5'- ACT TGC CTG TCG CTC TAT CTT | CAC CAC TAT TCG GTG GTC  
243 TGC-3'). The second fragment (96 PCR reactions) used 0.4 ul of 10uM forward primer  
244 (SJ\_F2\_7425: 5'-TTT CTG TTG GTG CTG ATA TTG | CTC CCT GCC GTC ATT CTT ATC)  
245 and 0.4 ul of 10 uM reverse primer (SJ\_R2\_15424: 5'-ACT TGC CTG TCG CTC TAT CTT |  
246 CGA CGA CTA CGT CTG CGA CAA). All primers have ONT adaptor regions on the first 27  
247 bases as indicated by '|'. All PCR reactions followed the following protocol: 94 °C 3 minutes, 25  
248 cycles of 94 °C 30s, 60 °C 30s, 65 °C 8:20, a final extension of 68 °C 10 minutes followed by  
249 storage at 4 °C. Following the first PCR, a second 5 ul PCR reaction was conducted for each of  
250 the 96 samples by combining 2.5 ul NEB Long Amp mastermix, 0.1 ul of a unique barcode  
251 (Oxford Nanopore PCR Barcode kit 01-96, batch DK601001 brown box) and finally pooling 1.2  
252 ul of each PCR product (first + second fragment). Barcodes were transferred to the PCR reaction

253 plate using the acoustic liquid handler Labcyte Echo 550. The same PCR reaction was used. A  
254 final 2 ul of sample was pulled from all samples and processed through the QiaQuick PCR  
255 purification kit (Qiagen, Cat#28106) and run on a 1% agarose gel to confirm size. The pool was  
256 then run on a used MinION using the 1D PCR barcoding protocol (SQK-LSK109). Samples  
257 were demultiplexed, uploaded to Galaxy [54], and aligned against the *Scomber japonicus*  
258 reference mitochondria genome (NC\_013723) using LASTZ aligner (Galaxy version 1.3.2)[55]  
259 using defaults. Consensus sequences were visualized, calculated, and exported using the quick  
260 consensus mode in Integrated Genome Viewer [56]. Samples with either less than an average of  
261 10x coverage or samples with more than 20 ambiguous basepairs (Ns) were excluded from the  
262 analysis (n=2, BC52, BC82). A phylogenetic tree of all 91 *S. japonicus* samples along with three  
263 reference *S. japonicus* mitochondrial genomes from NCBI (AB488405.1, NC\_013723.1,  
264 AB102724.1), and two outgroup species *Scomber colias* (NC\_013724.1) and *Scomber*  
265 *australasicus* (AB102725.1) was generated using MAFFT [49] (NJ conserved sites 12388,  
266 Jukes-Cantor substitution model, bootstrap 100) and visualized with Phylo.io using default  
267 parameters [50].

268

269 All microbiome data is publicly available through Qiita (sample ID 11721, prep ID 4638), EBI  
270 (ERP109537), and NCBI (BioProject PRJEB27458).

271

## 272 **Results**

273

274 **Microbial diversity associated with a marine pelagic fish across body sites over one year**

275 From January 2017 to January 2018, 229 wild *Scomber japonicus* were collected from the SIO  
276 pier across 38 sampling events at approximately five fish per week, although actual takes varied  
277 due to weather and other constraints. Sea water temperature, salinity, pressure, and chlorophyll *a*  
278 were recorded using the SCOOS online database (Figure 1a). Fork length and mass were  
279 recorded and approximate age of the fish determined from length (Figure 1b). The condition  
280 factor of the fish was positively associated with older fish ( $P < 0.0001$ ,  $R^2 = 0.307$ ) (Figure 1c).  
281 Along with paired sea water samples, mucosal microbiome samples were sequenced from the  
282 gill, skin, digesta, GI, and pyloric caeca of each fish (Figure 1d).

283  
284 A total of 612 samples resulting in 18 857 sOTUs, processed with the miniaturized PCR method,  
285 passed the sample exclusion criteria. Sample exclusion criteria was based on the KatharoSeq  
286 method where the read counts from DNA extraction positive controls of varying cell counts was  
287 compared to compositional read out and the read count at which 90% of the reads mapped  
288 appropriately was chosen as the rarefaction depth, which was 1 362 reads (Supplementary Figure  
289 1). Alpha diversity measured by Faith's PD, was significantly different when compared across  
290 mackerel body sites and sea water (Kruskal-Wallis,  $P < 0.0001$ , KW statistic 87.48) (Figure 2a).  
291 Gill, skin, and digesta samples had higher diversity than the GI and pyloric caeca samples while  
292 gill and digesta had higher diversity than sea water (Figure 2a). Beta diversity indicates the gill  
293 and skin mucosal samples were most similar to sea water while digesta, GI, and pyloric caeca  
294 were uniquely clustered and also had higher within body site variability (Figure 2b). Some of the  
295 digesta samples also appeared to cluster more closely to sediment samples. When tested, skin  
296 followed by gill samples were most similar to sea water samples whereas the digesta samples  
297 were most similar to sediment (Figure 2c). To understand sample size requirements for capturing

298 novel microbial diversity in fish, we compared accumulation of microbial richness over the one-  
299 year sampling period across all sample types. Overall microbial richness in the gill, skin, GI,  
300 pyloric caeca, and sea water appeared to level off after only a couple months (20-50 samples)  
301 whereas digesta samples continued to increase perhaps requiring another few years of data  
302 collection to approach saturation. For comparison, we included gill, skin, and digesta samples  
303 from 14 other local San Diego species of fish (right of the dotted line) (Figure 2d). While digesta  
304 diversity increased with the addition of the first new species it followed a similar trend while gill  
305 and skin samples did not increase much suggesting an overall conservation of microbes in other  
306 species of fish. Lastly, total Gamma diversity or richness was calculated for all samples in this  
307 study showing that sediment samples had the most microbial diversity followed by mackerel  
308 digesta and mackerel gill. The total unique microbial diversity in a single species of fish, *S.*  
309 *japonicus*, was 8.8 fold more than sea water (9 172 vs. 1 039 sOTUs) (Figure 2d), demonstrating  
310 the potential for microbial discovery within and upon fish hosts in the ocean.

311

### 312 **Environmental and biological drivers of the *S. japonicus* mucosal community**

313 We next quantified the combined and specific effects of four environmental variables including  
314 chlorophyll *a* concentration, sea water temperature, salinity, and pressure along with four  
315 biological variables including fish age, fork-length, mass, and condition factor on the fish-  
316 associated mucosal microbiomes. Alpha diversity measures were assessed using the General  
317 Linear Model (GLM). For alpha diversity measures of Shannon diversity, skin mucus was  
318 significantly influenced by the factors ( $P < 0.001$ ,  $R^2 = 0.38$ , F-stat 6.595), with chlorophyll *a*  
319 having a negative association and temperature a positive association ( $P < 0.0001$ ,  $P = 0.0004$ ),  
320 respectively. Gill samples were not assessed (grey line Table 1) because the Shannon diversity

321 did not meet the assumptions of normally distributed residuals (Shapiro test  $P < 0.05$ ) and was  
322 not homoscedastic (Breusch-Pagan  $P < 0.05$ ) (Table 1). For the alpha diversity measure of Faith's  
323 phylogenetic diversity (PD), which takes into account phylogenetic diversity with richness, all  
324 data was log transformed to meet the assumptions of the GLM. The gastrointestinal tract samples  
325 however, still did not meet the assumptions as the residuals were not normally distributed  
326 (Shapiro test  $P < 0.05$ ), thus were excluded from analysis (grey line Table 1). Both gill, skin, and  
327 pyloric caeca Faith's PD were significantly influenced by the measured factors (gill:  $P < 0.0001$ ,  
328  $R^2 = 0.33$ ,  $F\text{-state} = 7.042$ ; skin:  $P = 0.00039$ ,  $R^2 = 0.26$ ,  $F\text{-stat} = 4.239$ ; pyloric caeca:  $P = 0.00891$ ,  
329  $R^2 = 0.22$ ,  $F\text{-stat} = 2.972$ ). The gill sample diversity was negatively associated with Chlorophyll *a*  
330 concentration ( $P = 0.00549$ ). Skin was negatively associated with Chlorophyll *a* concentration  
331 ( $P = 0.00182$ ) and age ( $P = 0.00811$ ), while positively associated with temperature ( $P = 0.04434$ ).  
332 The pyloric caeca was positively associated with age ( $P = 0.04787$ ) and temperature ( $P = 0.00305$ )  
333 while negatively associated with salinity ( $P = 0.04921$ ).

334

335 The extent to which environmental and biological variables explain microbial diversity was also  
336 assessed for Beta diversity including both unweighted UniFrac and weighted UniFrac distances.  
337 The Adonis permutational multivariate statistical analysis was used to test overall significance  
338 along with variance explanation by factor. Unweighted UniFrac distance measures showed that  
339 gill, skin, and digesta samples were influenced by measured factors (Adonis,  $P < 0.0001$ ,  $R^2 = 0.12$ ,  
340  $R^2 = 0.15$ ,  $R^2 = 0.09$ ). The gill was primarily driven by Chlorophyll *a* concentration and age while  
341 skin was influenced mostly by Chlorophyll *a*, age, and fork-length. For weighted UniFrac  
342 distances, both gill ( $P < 0.0001$ ,  $R^2 = 0.14$ ) and skin ( $P = 0.001$ ,  $R^2 = 0.20$ ) were significantly  
343 influenced by factors with age being the most significant driver. In summary, the skin mucosal

344 microbiome was significantly influenced by environmental and biological factors in each of the  
345 four measures across alpha and beta diversity while gill was significant in each of the three  
346 measures. The environmental variables of Chlorophyll *a* followed by temperature had the most  
347 frequent influences on microbial communities across body sites while age was the most frequent  
348 biological factor (Table 1).

349

### 350 **Population structure of *S. japonicus***

351 *S. japonicus* are thought to have three spawning populations along the Pacific coast of North  
352 America[4], which suggest that our environmental and biological associations could be explained  
353 in part by population dynamics over the year. To estimate the changes in *S. japonicus* population  
354 structure over our time course we sequenced two fragments of mitochondrial DNA directly from  
355 skin mucus gDNA for a total length of 14 769 bp for 93 fish samples landed between Aug 27  
356 2017 and Jan 26 2018. Two samples were removed from the analysis due to having lower  
357 coverage (less than 10x) or more than 20 Ns in the consensus sequence (Supplemental Figure  
358 2a). The majority of samples (93%) had at least 100x coverage of the mitochondria target region  
359 (Supplemental Figure 2b). Based on near full-length mitochondria data, no population structure  
360 was observed, consistent with our sampling of one population of *S. japonicus* over the course of  
361 the study (Supp Figure 3).

362

363

### 364 **Candidate pathogen and probiotic associations**

365 Microbial diversity was unique within the various *S. japonicus* body sites and environment (sea  
366 water and sediment) with the top 25 most abundant genera comprising the majority of reads



367 (Figure 3). *Rhodobacteraceae* were found in all environments particularly the seawater with  
368 lower levels in the gill, skin, digesta, and GI body sites. The gill was dominated by several  
369 sOTUs within the *Shewanella* genera along with microbes from the *Rickettsiales* and  
370 *Polynucleobacter* genera. Sea water microbes including *Rhodobacter* and *Pelagibacter* were also  
371 present on the gill in lower numbers. Various sOTUs of *Photobacterium* were highly abundant  
372 across the skin, digesta, GI, and pyloric caeca. *Enterovibrio*, another fish pathogen, was  
373 abundant on the fish skin and pyloric caeca. Digesta samples were comprised of many seawater  
374 dwelling Cyanobacteria including *Synechococcus* but was also high in the family *Pirellulaceae*  
375 (Planctomycetes) and sporadically high amounts of the genus *Clostridium*. *Mycoplasma*  
376 (Tenericutes) was a dominant genus in the GI and pyloric caeca. Various *Bacillus spp.* and  
377 *Lactobacillus spp.* were found to be present across multiple body sites (Supplemental Figure 4).  
378 As expected, seawater contained many common groups including *Synechococcus*,  
379 *Rhodobacteraceae*, *Pelagibacter*, and *Flavobacteriaceae* while the sediment had consistently  
380 higher levels of *Pirellulaceae* (Figure 4).

381  
382 There were five highly abundant *Photobacterium* sOTUs in the dataset which prompted further  
383 phylogenetic evaluation to elucidate species level assignments. The full 16S rRNA genes of two  
384 pathogenic isolates of *P. damsela*, four other *Photobacterium* species including *P. angustum*, *P.*  
385 *phosphoreum*, *P. leiognathi*, and *P. rosenbergii* and two vibrio species as outgroups were aligned  
386 with the five *Photobacterium* unique 150 bp sOTUs. The phylogenetic tree (Figure 4a) of the  
387 five *Photobacterium* sOTUs in this dataset with the known *Photobacterium* strains is able to  
388 identify and resolved the taxonomic assignments. The *Photobacterium damsela* sOTU  
389 identified in our dataset was 100% identical to the v4 region of 16S rRNA from the two

390 pathogenic strains while distinct from the other *Photobacterium spp.* This *P. damsela* sOTU  
391 was identified across various body sites of fish, but was most prevalent in the GI, skin, and  
392 digesta samples (present across 22.2%, 16.1%, and 14.7% of samples, respectively) (Figure 4b).  
393 For the GI, skin, and digesta samples which had *P. damsela* present, the single *P. damsela*  
394 sOTU made up 5.88%, 6.99%, and 5.32% of the total microbial composition, respectively.  
395 Further, the temporal enrichment and prevalence of this *P. damsela* sOTU was highest between  
396 June and September.

397

## 398 **Discussion**

399

400 Our study evaluated how the mucosal microbial community of a wild marine fish species is  
401 influenced according to environmental and biological variance as experienced over the course of  
402 an annual season in coastal temperate waters. Body sites had unique microbial signatures that  
403 were uniquely influenced by environmental and biological measures. Alpha diversity was highest  
404 in the gill, skin, and digesta communities as compared to the gastrointestinal tract and pyloric  
405 caeca. Beta diversity measures demonstrated that fish mucosal sites were primarily driven by  
406 body site location and were further unique to the surrounding environment. An exposure gradient  
407 was observed with skin and gill surfaces being more similar to the water column while the  
408 digesta community more similar to the sediment. Further, the environmental and biological  
409 variables best explained variation in the skin and gill microbiomes as opposed to the internal  
410 body sites (digesta, GI, pyloric caeca). Lastly, an important fish pathogen, *Photobacterium*  
411 *damsela* was observed in high prevalence on GI, skin, and digesta communities and was  
412 associated with the summer months which exhibit higher temperatures and low nutrients. This is

413 the first comprehensive microbiome study of a marine fish that evaluates multiple body sites  
414 from a large sample size over an extended time series.  
415  
416 Regardless of environmental conditions, the mackerel mucosal body site was the strongest driver  
417 of microbiome diversification, with each site associated with a specific gradient of  
418 environmental exposure. The gill and skin communities were most similar to the seawater  
419 whereas the gastrointestinal samples were more divergent. This environmental gradient which  
420 distinguishes host-associated gut microbes from free-living microbes, was first described in  
421 mammalian vertebrates [57]. Environmental exposure gradients have also been shown to  
422 influence gut or skin microbiomes in amphibians, fish [58, 59], and other vertebrates [60, 61],  
423 whereas our study is the first comprehensive community assessment that explicitly tests this  
424 comparison with multiple mucosal body sites in fish. Marine fish differ from other vertebrates in  
425 that their microbial exposure rates are greatly elevated compared to terrestrial or freshwater  
426 species. Seawater can harbor as many as 1 million cells per ml [62], while coastal sediments can  
427 be two-orders of magnitude higher at 100 million cells per cm<sup>3</sup> [63]. Gill microbial communities  
428 may be supported physically by complex morphological structure of laminae and filaments and  
429 chemically through gas exchange, ion transport, and waste excretion. Age, phylogeny, diet, and  
430 individual have been implicated as influencing the gill microbial community in tropical fish, with  
431 *Shewanella* taxa being dominant [64]. Skin microbiomes of marine tropical fish have been also  
432 shown to be driven by phylogeny and diet [65]. Digesta and GI samples in *S. japonicus* were the  
433 most variable suggesting that either niche differentiation is more static in the gill and skin  
434 environments or that microbial turnover is lower. Few studies, however, have evaluated these  
435 body sites in temperate marine fish. Discovery of novel microbial lineages and metabolic activity

436 should focus on fish mucosal associated environments, specifically the gill, skin, and digesta  
437 communities that had the highest levels of phylogenetic diversity in our dataset. Sediment  
438 samples had the highest diversity, yet were most similar, thus having the lowest inter-individual  
439 variability.

440

441 The environmental and biological variables most explained the skin and gill microbiomes as  
442 compared to the internal GI communities. Within the environmental variables, Chlorophyll *a*  
443 concentration followed by temperature and salinity were the strongest drivers while age was the  
444 most pronounced of the biological metrics. Chlorophyll *a* concentration is a general indicator of  
445 primary production and microbial growth or proliferation in the water column. As phytoplankton  
446 blooms occur in the ocean due to nutrient enrichments through upwelling, bacterial communities  
447 in the water column also change thus altering exposure to fish and other marine animals. While  
448 many studies have examined the effects of harmful algal blooms on marine organisms [66], few  
449 have quantified the extent of these exposures in the wild. Temperature has been shown to  
450 influence marine macroalgae [67] and oyster hemolymph microbiomes [68]. Salinity was one of  
451 the first major abiotic conditions shown to drive microbiomes in free-living freshwater versus  
452 marine environments [69] and has also been shown to influence fish microbiomes  
453 deterministically [70]. Fish gill parasite load has been shown to be positively associated with fish  
454 age, season, eutrophic water conditions [71], and temperature [72]. This may be explained by  
455 increased biofouling activity or biofilm formation over time on the gills or could be a response to  
456 parasite persistence. Unfortunately, we did not measure parasite abundances on the gill, but this  
457 would be an important area of research to examine the impact of parasite load on microbiome  
458 diversity, or vice versa. Understanding the effects of age on the microbiome was first

459 demonstrated in African turquoise killifish where it was shown that microbiomes from older fish  
460 were associated with inflammation in the gut which could be rescued by fecal microbiome  
461 transplants from younger fish [73]. It has been suggested that during host ageing, gut  
462 communities of vertebrates may shift from commensal to pathogenic leading to increased  
463 inflammation and overall dysbiosis [74]. Our results indicate that microbial communities from  
464 other body sites may also be influenced by ageing or development of fish and is deserving of  
465 additional research. Additional host-associated explanatory variables not measured in our study,  
466 include diet or trophic level and host genotype. However, our assessment did determine at least  
467 based on mitochondria DNA, that the genetic population of mackerel was heterogeneous which  
468 further verifies the importance of environment and fish development stage on driving microbial  
469 communities.

470  
471 Along with being most influenced by environmental and biological factors, overall the skin and  
472 gill communities were more similar phylogenetically to the sea water. Interestingly, of all  
473 mucosal sites, digesta samples were most similar to the sediment. This could be explained if the  
474 fish were feeding on benthic organisms [75] such as crustaceans buried in the sand. Although not  
475 quantified, we did find various types of crustaceans in the stomachs of the larger fish along with  
476 occasional gritty material which appeared to be sediment [76]. It is also possible that wave  
477 turbulence in nearshore environments where the fish were caught could also cause fish to be  
478 exposed to higher sediment levels through resuspension [77]. Since sediments are often  
479 repositories of decaying organic matter including anthropogenic contaminants, it is important to  
480 consider the negative health implications on a fish population as well as the potential human

481 impacts associated with recreational fishing that occurs in near-shore locations, such as piers,  
482 and consumption of these fish.

483

484 Various potential pathogenic and beneficial microbes were persistently abundant across seasons  
485 which has important implications for climate change and aquaculture. *Photobacterium damsela*  
486 was present in skin and gut communities and in relatively high abundance compared to other  
487 microbes. High abundance relative to other microbes and prevalence across fish replicates could  
488 have important negative health implications as this is an important globally distributed [53] fish  
489 [78] pathogen causing bacterial septicemia that has also been implicated as an important genera  
490 for co-evolution in marine hosts [79]. If *P. damsela* is an important host-associated microbe,  
491 understanding the conditions by which it becomes pathogenic will be important in modeling  
492 fishery impacts. This pathogen has caused financial losses in marine fish farms across numerous  
493 species including yellowtail, gilthead seabream, and seabass [80, 81] and is thought to be  
494 transferred through water [82] to other species even infecting humans [83]. Chub mackerel are a  
495 very important forage fish consumed by many higher trophic level fish including tunas, billfish,  
496 and jacks which could have implications for trophic transfer of pathogens warranting future  
497 studies. Further, this microbe was most prevalent and abundant during the summer months  
498 suggesting it could be associated with high water temperatures and low nutrients. Extending this  
499 time series for another 3-10 years will be crucial to continue monitoring. While time series  
500 datasets exist for marine free-living microbial communities, few exist for marine vertebrates.  
501 Evaluating the extent by which exposure to marine pathogens influences disease is important for  
502 estimating impacts to fisheries. Further, as marine aquaculture activities continue to expand in  
503 coastal waters, farm monitoring through the host-microbiome could be an important tool for

504 preventing disease outbreaks and massive losses. Experimental mesocosm studies could also be  
505 useful to model this marine vertebrate pathogen. Examples in other vertebrates of wide spread  
506 prevalence of opportunistic pathogens includes 20-80% carriage rates of *Staphylococcus aureus*  
507 in humans [84].

508

509 Some novel candidate symbiotic interactions were discovered when evaluating microbial  
510 ecology across the various mucosal sites. In the gills, several *Shewanella spp.* were highly  
511 prevalent in mackerel which is consistent with tropical fish microbiome studies [64] suggesting a  
512 potential symbiotic role. Some *Shewanella spp.* are common marine genera responsible for  
513 eicosapentaenoic acid (20:5n-3, an omega-3 polyunsaturated fatty acid) production [85, 86] and  
514 have been documented in freshwater fish [87]. Both *Bacillus* and *Lactobacillus* strains make up  
515 close to 50% of the microbial taxa in commercially available probiotics for aquaculture [88, 89].  
516 Therefore, mucus from wild marine fish could provide a novel source of probiotics for use in the  
517 aquaculture industry.

518

519 In our study, we have for the first time evaluated the full mucosal microbiome of a single marine  
520 fish species. This design makes it the longest running wild marine fish microbiome study  
521 encompassing five body sites within a single species of fish caught over one year. The Pacific  
522 chub mackerel microbiome was primarily differentiated by mucosal body site. Environmental  
523 conditions and host biology primarily drives the skin and gill mucosal microbiomes with  
524 Chlorophyll a concentration, age, and temperature having the broadest effects. Our results  
525 provide the foundation to understanding natural microbiome variation of a wild marine fish

526 which is economically important and provides a basis for asking how questions about how  
527 climate change may impact the marine fish microbiome in a positive or negative way.

528

## 529 **Conflict of interest**

530 The authors declare there is no conflict of interest.

531

## 532 **Acknowledgements**

533

534 This work was supported by grants NSF (OCE-1313747) and NIEHS (P01-ES021921) to E.E.A.

535 We thank the Center for Microbiome Innovation at UC San Diego for support through the

536 Microbial Sciences Graduate Research Fellowship to J.J.M. We thank Karen Minich for graphic

537 design assistance on Figure 1. We thank Shane Poplawski and Rachael Gominsky from JCVI for

538 advice and assistance on using Oxford Nanopore sequencing.

539

## 540 **References**

541

542 1. Hernández JJC, Ortega ATS, Nations F and AO of the U. Synopsis of Biological Data on the  
543 Chub Mackerel (*Scomber Japonicus* Houttuyn, 1782). 2000. Food & Agriculture Org.

544 2. COLLETTE B. Scombrids of the world. An annotated and illustrated catalogue of tunas,  
545 mackerels, bonitos and related species known to date. *FAO Fish Synop* 1983; **125**: 1–137.

546 3. FAO. The State of World Fisheries and Aquaculture 2016 (SOFIA): Contributing to food  
547 security and nutrition for all. 2016. FAO, Rome, Italy.



- 548 4. Crone PR. PACIFIC MACKEREL (*Scomber japonicus*) STOCK ASSESSMENT FOR USA  
549 MANAGEMENT IN THE 2009-10 FISHING YEAR.
- 550 5. MACCALL AD. Recent increased abundance and potential productivity of Pacific mackerel  
551 (*Scomber japonicus*). *Calif Coop Ocean Fish Invest Rep* 1985; **26**: 119–129.
- 552 6. Yatsu A, Watanabe T, Ishida M, Sugisaki H, Jacobson LD. Environmental effects on  
553 recruitment and productivity of Japanese sardine *Sardinops melanostictus* and chub  
554 mackerel *Scomber japonicus* with recommendations for management. *Fish Oceanogr*  
555 2005; **14**: 263–278.
- 556 7. Yatsu A, Mitani T, Watanabe C, Nishida H, Kawabata A, Matsuda H. Current stock status  
557 and management of chub mackerel, *Scomber japonicus*, along the Pacific coast of Japan.  
558 *Fish Sci* 2002; **68**: 93–96.
- 559 8. Chen X, Li G, Feng B, Tian S. Habitat suitability index of Chub mackerel (<Emphasis  
560 Type="Italic">*Scomber japonicus*</Emphasis>) from July to September in the East China  
561 Sea. *J Oceanogr* 2009; **65**: 93–102.
- 562 9. HUNTER JR. Early life history of Pacific mackerel, *Scomber japonicus*. *Fish Bull* 1980; **78**:  
563 89–101.
- 564 10. Fry DH, Roedel PM. Fish Bulletin No. 73. Tagging Experiments on the Pacific Mackerel  
565 (*Pneumatophorus diego*). 1949.
- 566 11. Sinclair M, Tremblay MJ, Bernal P. El Niño Events and Variability in a Pacific Mackerel  
567 (*Scomber japonicus*) Survival Index: Support for Hjort's Second Hypothesis. *Can J Fish*  
568 *Aquat Sci* 1985; **42**: 602–608.

- 569 12. Ouwerkerk JP, de Vos WM, Belzer C. Glycobiome: Bacteria and mucus at the epithelial  
570 interface. *Best Pract Res Clin Gastroenterol* 2013; **27**: 25–38.
- 571 13. Beck BH, Peatman E. Mucosal Health in Aquaculture. 2015. Academic Press.
- 572 14. Gomez D, Sunyer JO, Salinas I. The mucosal immune system of fish: The evolution of  
573 tolerating commensals while fighting pathogens. *Fish Shellfish Immunol* 2013; **35**: 1729–  
574 1739.
- 575 15. Xu Z, Parra D, Gómez D, Salinas I, Zhang Y-A, von Gersdorff Jørgensen L, et al. Teleost skin,  
576 an ancient mucosal surface that elicits gut-like immune responses. *Proc Natl Acad Sci U S A*  
577 2013; **110**: 13097–13102.
- 578 16. Nigam AK, Kumari U, Mittal S, Mittal AK. Comparative analysis of innate immune  
579 parameters of the skin mucous secretions from certain freshwater teleosts, inhabiting  
580 different ecological niches. *Fish Physiol Biochem* 2012; **38**: 1245–1256.
- 581 17. Estes L, Elsen PR, Treuer T, Ahmed L, Caylor K, Chang J, et al. The spatial and temporal  
582 domains of modern ecology. *Nat Ecol Evol* 2018; **2**: 819–826.
- 583 18. Fuhrman JA, Cram JA, Needham DM. Marine microbial community dynamics and their  
584 ecological interpretation. *Nat Rev Microbiol* 2015; **13**: 133–146.
- 585 19. Gilbert JA, Steele JA, Caporaso JG, Steinbrück L, Reeder J, Temperton B, et al. Defining  
586 seasonal marine microbial community dynamics. *ISME J* 2012; **6**: 298–308.
- 587 20. Smits SA, Leach J, Sonnenburg ED, Gonzalez CG, Lichtman JS, Reid G, et al. Seasonal cycling  
588 in the gut microbiome of the Hadza hunter-gatherers of Tanzania. *Science* 2017; **357**: 802–  
589 806.

- 590 21. Al-Harbi AH, Naim Uddin M. Seasonal variation in the intestinal bacterial flora of hybrid  
591 tilapia (*Oreochromis niloticus*×*Oreochromis aureus*) cultured in earthen ponds in Saudi  
592 Arabia. *Aquaculture* 2004; **229**: 37–44.
- 593 22. Karlsen C, Ottem KF, Brevik ØJ, Davey M, Sørum H, Winther-Larsen HC. The environmental  
594 and host-associated bacterial microbiota of Arctic seawater-farmed Atlantic salmon with  
595 ulcerative disorders. *J Fish Dis* 2017; **40**: 1645–1663.
- 596 23. FULTON T. The rate of growth of fishes. *Twenty-Second Annu Rep* 1904; 141–241.
- 597 24. Froese R. Cube law, condition factor and weight–length relationships: history, meta-  
598 analysis and recommendations. *J Appl Ichthyol* ; **22**: 241–253.
- 599 25. Methot RD, Wetzel CR. Stock synthesis: A biological and statistical framework for fish stock  
600 assessment and fishery management. *Fish Res* 2013; **142**: 86–99.
- 601 26. Minich JJ, Zhu Q, Janssen S, Hendrickson R, Amir A, Vetter R, et al. KatharoSeq Enables  
602 High-Throughput Microbiome Analysis from Low-Biomass Samples. *mSystems* 2018; **3**:  
603 e00218-17.
- 604 27. Caporaso JG, Lauber CL, Walters WA, Berg-Lyons D, Huntley J, Fierer N, et al. Ultra-high-  
605 throughput microbial community analysis on the Illumina HiSeq and MiSeq platforms.  
606 *ISME J* 2012; **6**: 1621–1624.
- 607 28. Walters W, Hyde ER, Berg-Lyons D, Ackermann G, Humphrey G, Parada A, et al. Improved  
608 Bacterial 16S rRNA Gene (V4 and V4-5) and Fungal Internal Transcribed Spacer Marker  
609 Gene Primers for Microbial Community Surveys. *mSystems* 2016; **1**: e00009-15.

- 610 29. Minich JJ, Humphrey G, Benitez RAS, Sanders J, Swafford A, Allen EE, et al. High-  
611 Throughput Miniaturized 16S rRNA Amplicon Library Preparation Reduces Costs while  
612 Preserving Microbiome Integrity. *mSystems* 2018; **3**: e00166-18.
- 613 30. Gonzalez A, Navas-Molina JA, Kosciolk T, McDonald D, Vázquez-Baeza Y, Ackermann G, et  
614 al. Qiita: rapid, web-enabled microbiome meta-analysis. *Nat Methods* 2018; **15**: 796–798.
- 615 31. Caporaso JG, Kuczynski J, Stombaugh J, Bittinger K, Bushman FD, Costello EK, et al. QIIME  
616 allows analysis of high-throughput community sequencing data. *Nat Methods* 2010; **7**:  
617 335–336.
- 618 32. Amir A, McDonald D, Navas-Molina JA, Kopylova E, Morton JT, Zech Xu Z, et al. Deblur  
619 Rapidly Resolves Single-Nucleotide Community Sequence Patterns. *mSystems* 2017; **2**.
- 620 33. Janssen S, McDonald D, Gonzalez A, Navas-Molina JA, Jiang L, Xu ZZ, et al. Phylogenetic  
621 Placement of Exact Amplicon Sequences Improves Associations with Clinical Information.  
622 *mSystems* 2018; **3**: e00021-18.
- 623 34. Whittaker RH. Evolution and Measurement of Species Diversity. *Taxon* 1972; **21**: 213–251.
- 624 35. Shannon CE. A Mathematical Theory of Communication. *SIGMOBILE Mob Comput*  
625 *Commun Rev* 2001; **5**: 3–55.
- 626 36. Faith DP. Conservation evaluation and phylogenetic diversity. *Biol Conserv* 1992; **61**: 1–10.
- 627 37. Lozupone C, Knight R. UniFrac: a New Phylogenetic Method for Comparing Microbial  
628 Communities. *Appl Environ Microbiol* 2005; **71**: 8228–8235.
- 629 38. Lozupone C, Lladser ME, Knights D, Stombaugh J, Knight R. UniFrac: an effective distance  
630 metric for microbial community comparison. *The ISME Journal*.  
631 <https://www.nature.com/articles/ismej2010133>. Accessed 22 May 2018.

- 632 39. Vázquez-Baeza Y, Pirrung M, Gonzalez A, Knight R. EMPeror: a tool for visualizing high-  
633 throughput microbial community data. *GigaScience* 2013; **2**: 16.
- 634 40. Kruskal WH, Wallis WA. Use of Ranks in One-Criterion Variance Analysis. *J Am Stat Assoc*  
635 1952; **47**: 583–621.
- 636 41. Quast C, Pruesse E, Yilmaz P, Gerken J, Schweer T, Yarza P, et al. The SILVA ribosomal RNA  
637 gene database project: improved data processing and web-based tools. *Nucleic Acids Res*  
638 2013; **41**: D590–D596.
- 639 42. McDonald D, Price MN, Goodrich J, Nawrocki EP, DeSantis TZ, Probst A, et al. An improved  
640 Greengenes taxonomy with explicit ranks for ecological and evolutionary analyses of  
641 bacteria and archaea. *ISME J* 2012; **6**: 610–618.
- 642 43. Fox J. Applied Regression Analysis and Generalized Linear Models. 2015. SAGE  
643 Publications.
- 644 44. Shapiro SS, Wilk MB. An Analysis of Variance Test for Normality (Complete Samples).  
645 *Biometrika* 1965; **52**: 591–611.
- 646 45. Breusch TS, Pagan AR. A Simple Test for Heteroscedasticity and Random Coefficient  
647 Variation. *Econometrica* 1979; **47**: 1287–1294.
- 648 46. Anderson MJ. A new method for non-parametric multivariate analysis of variance. *Austral*  
649 *Ecol* 2001; **26**: 32–46.
- 650 47. Zakrzewski M, Proietti C, Ellis JJ, Hasan S, Brion M-J, Berger B, et al. Calypso: a user-friendly  
651 web-server for mining and visualizing microbiome–environment interactions.  
652 *Bioinformatics* 2017; **33**: 782–783.

- 653 48. Kuraku S, Zmasek CM, Nishimura O, Katoh K. aLeaves facilitates on-demand exploration of  
654 metazoan gene family trees on MAFFT sequence alignment server with enhanced  
655 interactivity. *Nucleic Acids Res* 2013; **41**: W22-28.
- 656 49. Katoh K, Rozewicki J, Yamada KD. MAFFT online service: multiple sequence alignment,  
657 interactive sequence choice and visualization. *Brief Bioinform* .
- 658 50. Robinson O, Dylus D, Dessimoz C. Phylo.io: Interactive Viewing and Comparison of Large  
659 Phylogenetic Trees on the Web. *Mol Biol Evol* 2016; **33**: 2163–2166.
- 660 51. RUIJMY R, BREITTMAYER V, ELBAZE P, LAFAY B, BOUSSEMART O, GAUTHIER M, et al.  
661 Phylogenetic Analysis and Assessment of the Genera *Vibrio*, *Photobacterium*, *Aeromonas*,  
662 and *Plesiomonas* Deduced from Small-Subunit rRNA Sequences. *Int J Syst Evol Microbiol*  
663 1994; **44**: 416–426.
- 664 52. Osorio CR, Collins MD, Toranzo AE, Barja JL, Romalde JL. 16S rRNA Gene Sequence Analysis  
665 of *Photobacterium damsela* and Nested PCR Method for Rapid Detection of the  
666 Causative Agent of Fish Pasteurellosis. *Appl Environ Microbiol* 1999; **65**: 2942–2946.
- 667 53. Terceti MS, Ogut H, Osorio CR. *Photobacterium damsela* subsp. *damsela*, an Emerging  
668 Fish Pathogen in the Black Sea: Evidence of a Multiclonal Origin. *Appl Env Microbiol* 2016;  
669 **82**: 3736–3745.
- 670 54. Giardine B, Riemer C, Hardison RC, Burhans R, Elnitski L, Shah P, et al. Galaxy: A platform  
671 for interactive large-scale genome analysis. *Genome Res* 2005; **15**: 1451–1455.
- 672 55. Harris RS. Improved Pairwise Alignment of Genomic Dna. 2007. PhD Thesis, Pennsylvania  
673 State University.

- 674 56. Thorvaldsdóttir H, Robinson JT, Mesirov JP. Integrative Genomics Viewer (IGV): high-  
675 performance genomics data visualization and exploration. *Brief Bioinform* 2013; **14**: 178–  
676 192.
- 677 57. Ley RE, Lozupone CA, Hamady M, Knight R, Gordon JI. Worlds within worlds: evolution of  
678 the vertebrate gut microbiota. *Nat Rev Microbiol* 2008; **6**: 776–788.
- 679 58. Sullam KE, Essinger SD, Lozupone CA, O’connor MP, Rosen GL, Knight R, et al.  
680 Environmental and ecological factors that shape the gut bacterial communities of fish: a  
681 meta-analysis. *Mol Ecol* 2012; **21**: 3363–3378.
- 682 59. Wong S, Rawls JF. Intestinal microbiota composition in fishes is influenced by host ecology  
683 and environment. *Mol Ecol* ; **21**: 3100–3102.
- 684 60. Bevins CL, Salzman NH. The potter’s wheel: the host’s role in sculpting its microbiota. *Cell*  
685 *Mol Life Sci* 2011; **68**: 3675.
- 686 61. Colston TJ, Jackson CR. Microbiome evolution along divergent branches of the vertebrate  
687 tree of life: what is known and unknown. *Mol Ecol* ; **25**: 3776–3800.
- 688 62. Azam F, Fenchel T, Field JG, Gray JS, Meyer-Reil LA, Thingstad F. The Ecological Role of  
689 Water-Column Microbes in the Sea. *Mar Ecol Prog Ser* 1983; **10**: 257–263.
- 690 63. Kallmeyer J, Pockalny R, Adhikari RR, Smith DC, D’Hondt S. Global distribution of microbial  
691 abundance and biomass in subseafloor sediment. *Proc Natl Acad Sci* 2012; **109**: 16213–  
692 16216.
- 693 64. Pratte ZA, Besson M, Hollman RD, Stewart FJ. The Gills of Reef Fish Support a Distinct  
694 Microbiome Influenced by Host-Specific Factors. *Appl Environ Microbiol* 2018; **84**.

- 695 65. Chiarello M, Auguet J-C, Bettarel Y, Bouvier C, Claverie T, Graham NAJ, et al. Skin  
696 microbiome of coral reef fish is highly variable and driven by host phylogeny and diet.  
697 *Microbiome* 2018; **6**: 147.
- 698 66. Anderson DM, Glibert PM, Burkholder JM. Harmful algal blooms and eutrophication:  
699 Nutrient sources, composition, and consequences. *Estuaries* 2002; **25**: 704–726.
- 700 67. Minich JJ, Morris MM, Brown M, Doane M, Edwards MS, Michael TP, et al. Elevated  
701 temperature drives kelp microbiome dysbiosis, while elevated carbon dioxide induces  
702 water microbiome disruption. *PloS One* 2018; **13**: e0192772.
- 703 68. Lokmer A, Mathias Wegner K. Hemolymph microbiome of Pacific oysters in response to  
704 temperature, temperature stress and infection. *ISME J* 2015; **9**: 670–682.
- 705 69. Lozupone CA, Knight R. Global patterns in bacterial diversity. *Proc Natl Acad Sci* 2007; **104**:  
706 11436–11440.
- 707 70. Schmidt VT, Smith KF, Melvin DW, Amaral-Zettler LA. Community assembly of a euryhaline  
708 fish microbiome during salinity acclimation. *Mol Ecol* 2015; **24**: 2537–2550.
- 709 71. Hanek G, Fernando CH. The role of season, habitat, host age, and sex on gill parasites of  
710 *Lepomis gibbosus* (L.). *Can J Zool* 1978; **56**: 1247–1250.
- 711 72. Rohde K, Hayward C, Heap M. Aspects of the ecology of metazoan ectoparasites of marine  
712 fishes. *Int J Parasitol* 1995; **25**: 945–970.
- 713 73. Smith P, Willemsen D, Popkes M, Metge F, Gandiwa E, Reichard M, et al. Regulation of life  
714 span by the gut microbiota in the short-lived African turquoise killifish. *eLife* 2017; **6**.
- 715 74. Seidel J, Valenzano DR. The role of the gut microbiome during host ageing. *F1000Research*  
716 2018; **7**.



- 717 75. Weiss R. Feeding behaviour and formation of fish concentrations in the chub mackerel  
718 (Scomber colias) in the Northwest African fishing grounds. *ICES CM* 1974; **15**: 6.
- 719 76. Falk V. Sediments as food of the chub mackerel (*Scomber colias* Gmelin) off Northwest  
720 Africa. *ICES CM* 1967; 5.
- 721 77. Reise K. Sediment mediated species interactions in coastal waters. *J Sea Res* 2002; **48**:  
722 127–141.
- 723 78. Romalde JL. *Photobacterium damsela* subsp. *piscicida*: an integrated view of a bacterial  
724 fish pathogen. *Int Microbiol Off J Span Soc Microbiol* 2002; **5**: 3–9.
- 725 79. Urbanczyk H, Ast JC, Dunlap PV. Phylogeny, genomics, and symbiosis of *Photobacterium*.  
726 *FEMS Microbiol Rev* 2011; **35**: 324–342.
- 727 80. Magariños B, Toranzo AE, Romalde JL. Phenotypic and pathobiological characteristics of  
728 *Pasteurella piscicida*. *Annu Rev Fish Dis* 1996; **6**: 41–64.
- 729 81. Romalde JL, Magariños B. Immunization with bacterial antigens: pasteurellosis. *Dev Biol*  
730 *Stand* 1997; **90**: 167–177.
- 731 82. Fouz B, Toranzo AE, Milán M, Amaro C. Evidence that water transmits the disease caused  
732 by the fish pathogen *Photobacterium damsela* subsp. *damsela*. *J Appl Microbiol* 2000;  
733 **88**: 531–535.
- 734 83. Rivas AJ, Lemos ML, Osorio CR. *Photobacterium damsela* subsp. *damsela*, a bacterium  
735 pathogenic for marine animals and humans. *Front Microbiol* 2013; **4**.
- 736 84. Kluytmans J, van Belkum A, Verbrugh H. Nasal carriage of *Staphylococcus aureus*:  
737 epidemiology, underlying mechanisms, and associated risks. *Clin Microbiol Rev* 1997; **10**:  
738 505–520.

- 739 85. Yazawa K. Production of eicosapentaenoic acid from marine bacteria. *Lipids* 1996; **31**:  
740 S297–S300.
- 741 86. Nogi Y, Kato C, Horikoshi K. Taxonomic studies of deep-sea barophilic *Shewanella* strains  
742 and description of *Shewanella violacea* sp. nov. *Arch Microbiol* 1998; **170**: 331–338.
- 743 87. Dailey FE, McGraw JE, Jensen BJ, Bishop SS, Lokken JP, Dorff KJ, et al. The Microbiota of  
744 Freshwater Fish and Freshwater Niches Contain Omega-3 Fatty Acid-Producing *Shewanella*  
745 Species. *Appl Environ Microbiol* 2015; **82**: 218–231.
- 746 88. Gatesoupe FJ. The use of probiotics in aquaculture. *Aquaculture* 1999; **180**: 147–165.
- 747 89. Martínez Cruz P, Ibáñez AL, Monroy Hermosillo OA, Ramírez Saad HC. Use of probiotics in  
748 aquaculture. *ISRN Microbiol* 2012; **2012**: 916845.
- 749
- 750
- 751
- 752
- 753
- 754
- 755
- 756
- 757
- 758
- 759
- 760
- 761

## 762 Figure Legends

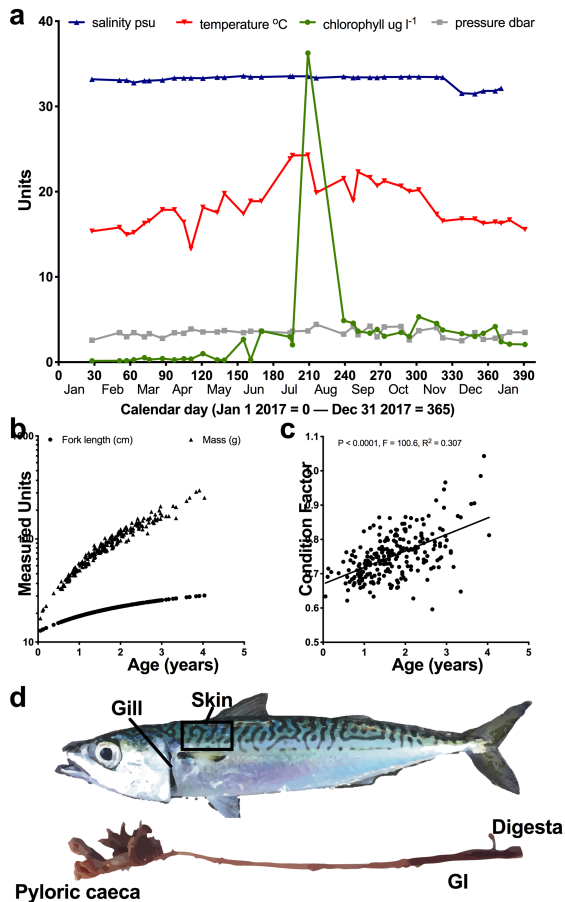

763 Figure 1

764 Figure 1. Environmental sampling design. Throughout 2017 and into early 2018, 229 Pacific  
765 chub mackerel, *S. japonicus*, were caught across 38 sampling events from the SIO pier. (a) Pier  
766 sea water measurements of temperature, salinity, pressure, and chlorophyll a were collected  
767 using the scoos.org database. (b) Ages of *S. japonicus* were inferred from fish lengths. (c)  
768 Condition factor was calculated for each fish based on length and mass. (d) Mucosal microbiome  
769 samples were collected from five body sites including gill, skin, pyloric caeca, GI biopsy, and  
770 fecal or digesta material removed from the lower GI.

771

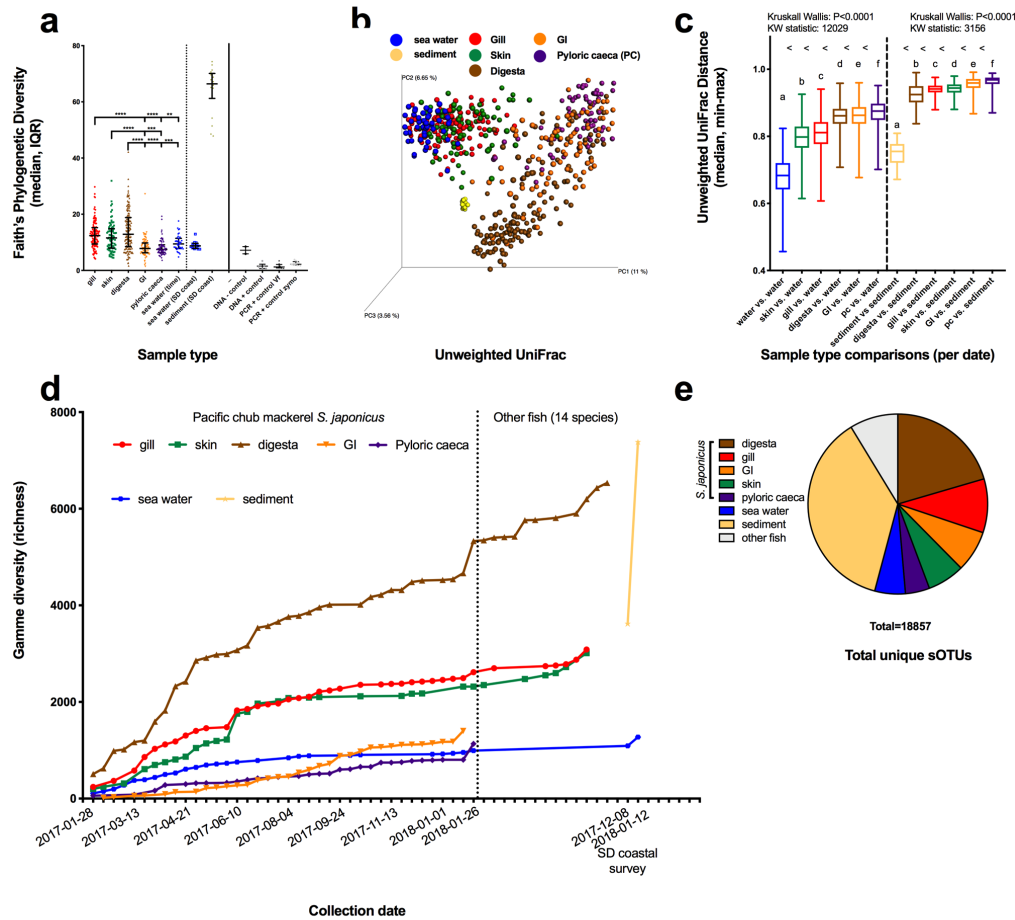

772 Figure 2  
 773 Figure 2. Microbial diversity of coastal environmental controls and *S. japonicus* mucosal  
 774 microbiome. (a) Alpha diversity was calculated using Faith's Phylogenetic diversity metric in  
 775 Qiime 1.9.1 with the median and interquartile range displayed. (b) PCoA plot of beta diversity as  
 776 calculated using Unweighted UniFrac with a rooted phylogenetic tree inserted using the SEPP  
 777 method in Qiita and Qiime1.9.1. (c) Distances of mucosal microbial communities (gill, skin,  
 778 digesta, GI, and pyloric caeca) compared to sea water and sediment samples using non-  
 779 parametric Kruskal-Wallis test. (d) Accumulation of total microbial diversity across  
 780 chronological sampling events within fish (*S. japonicus* and 14 other species) mucosal sites,  
 781 water samples, and sediment. (e) Proportion of unique microbial diversity (sOTUs) contributed  
 782 by body site or environment to the whole dataset.

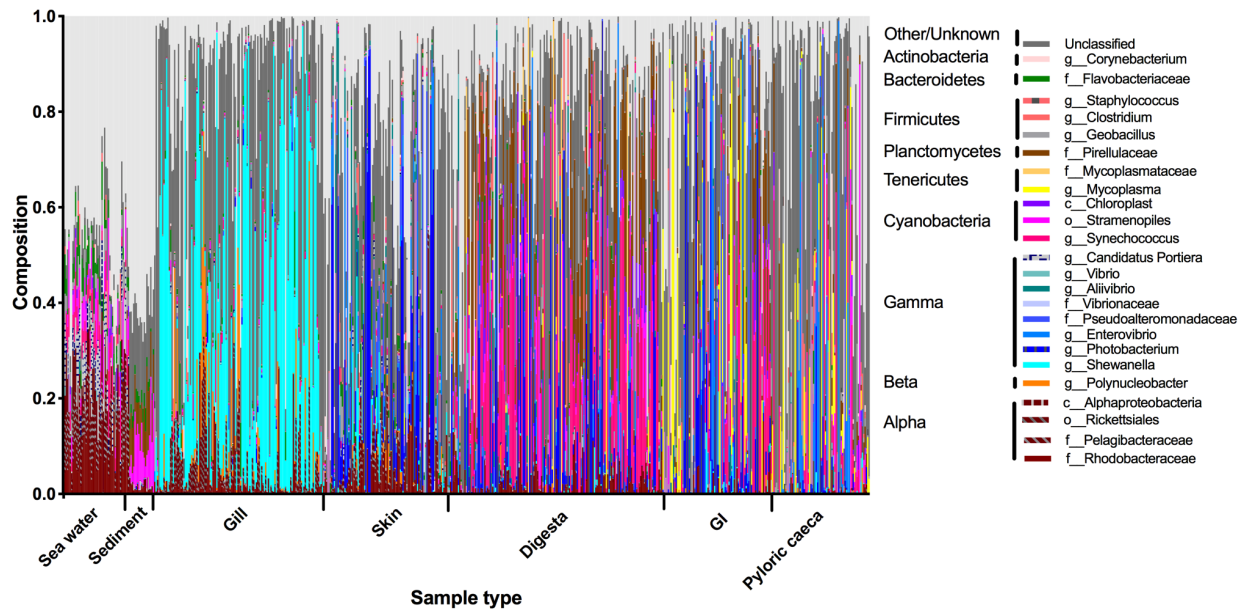

783 Figure 3

784 Figure 3. Top 25 most abundant genera across body sites.

785

786

787

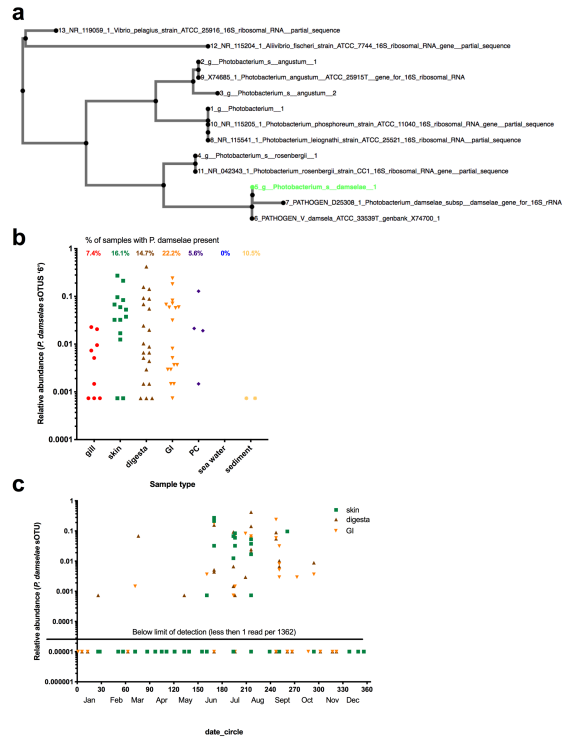

788 Figure 4

789 Figure 4. Prevalence of marine vertebrate pathogen, *Photobacterium damsela* on *S. japonicus*  
790 body sites throughout the sampling effort. (a) Validation of *P. damsela* 148 bp v4 region by  
791 way of phylogenetic comparison to two known pathogen isolates and and non-pathogenic strains.  
792 (b) Total relative abundance of *P. damsela* sOTU across five body sites and environments for  
793 successfully sequenced samples. Total prevalence or percent of samples with *P. damsela*  
794 present is also calculated for each sample type and displayed at top of graph (7.4% gill samples,  
795 16.1% skin, 14.7% digesta, 22.2% GI, 5.6% pyloric caeca, 0% water, 10.5% sediment). (c)  
796 Proportion of microbial community comprised of *P. damsela* sOTU across the most prevalent  
797 body sites (skin, digesta, GI) over the sampling effort of 1 year. Relative abundance is calculated  
798 as number of *P. damsela* sOTU reads divided by 1362, the rarefaction number. Any samples  
799 with 0 *P. damsela* reads are considered under the detection limit and are displayed as equal to  
800 0.00001 relative abundance in order to visualize on the log scale.

Table 1. . Quantification of environmental and biological variables on fish mucosal microbiomes as measured by (a) alpha diversity with Generalized Linear Model and (b) beta diversity with multivariate statistics (Adonis).

|    |           |        |                      |         | Host (biometrics) |           |           | Environmental (water conditions) |                                |              |           |                             |
|----|-----------|--------|----------------------|---------|-------------------|-----------|-----------|----------------------------------|--------------------------------|--------------|-----------|-----------------------------|
|    |           |        |                      |         | Age (years)       | FL (mm)   | Mas (kg)  | KNA                              | Chl a ( $\mu\text{g L}^{-1}$ ) | Press (dbar) | Sal (psu) | Temp ( $^{\circ}\text{C}$ ) |
| a  | Body site | Alpha  | Adj. R <sup>2</sup>  | F-stat  | P value           | P value   |           |                                  |                                |              |           |                             |
|    | gill*     | Shan   | 0.13                 | 2.89    | 0.006             |           |           |                                  |                                |              |           |                             |
|    | skin      | Shan   | 0.38                 | 6.60    | <0.0001           |           |           |                                  | <0.001 (-)                     |              |           | <0.001 (+)                  |
|    | digesta   | Shan   | -0.01                | 0.84    | 0.567             |           |           |                                  |                                |              |           |                             |
|    | GI        | Shan   | -0.01                | 0.94    | 0.494             |           |           |                                  |                                |              |           |                             |
|    | PC        | Shan   | 0.05                 | 1.35    | 0.244             | 0.027 (+) | 0.026 (+) |                                  |                                |              |           |                             |
|    | gill      | PD     | 0.33                 | 7.04    | <0.0001           |           |           |                                  | 0.005 (-)                      |              |           |                             |
|    | skin      | PD     | 0.26                 | 4.24    | <0.0001           | 0.008 (-) |           |                                  | 0.002 (-)                      |              |           | 0.044 (+)                   |
|    | digesta   | PD     | 0.02                 | 1.29    | 0.258             |           |           |                                  |                                | 0.036 (-)    |           |                             |
|    | GI**      | PD     | -0.01                | 0.91    | 0.514             |           |           |                                  |                                |              |           |                             |
| PC | PD        | 0.22   | 2.97                 | 0.009   | 0.048 (+)         |           |           |                                  |                                | 0.049 (-)    | 0.003 (+) |                             |
| b  | Body site | Beta   | Total R <sup>2</sup> | P value |                   | P value   |           |                                  |                                |              |           |                             |
|    | gill      | u UniF | 0.12                 | <0.0001 | 1                 | <0.001    |           |                                  | <0.001                         |              |           |                             |
|    | skin      | u UniF | 0.15                 | <0.0001 | 1                 | <0.001    | <0.001    |                                  | <0.001                         |              |           |                             |
|    | digesta   | u UniF | 0.09                 | <0.0001 | 1                 |           |           |                                  |                                |              |           |                             |

|         |           |      |             |            |  |
|---------|-----------|------|-------------|------------|--|
| GI      | u<br>UniF | 0.14 | 0.099       |            |  |
| PC      | u<br>UniF | 0.15 | 0.32        |            |  |
| gill    | w<br>UniF | 0.14 | <0.000<br>1 | <0.00<br>1 |  |
| skin    | w<br>UniF | 0.20 | 0.001       | <0.00<br>1 |  |
| digesta | w<br>UniF | 0.10 | 0.038       |            |  |
| GI      | w<br>UniF | 0.13 | 0.38        |            |  |
| PC      | w<br>UniF | 0.14 | 0.49        |            |  |

\* Shannon diversity of gill sample results excluded from analysis because residuals are non-normal & homoscedasticity

\*\* Faiths Phylogenetic Diversity for GI sample results excluded from analysis because residuals are non normal

Alpha: Shan = Shannon, PD = Faiths Phylogenetic diversity;

Beta: u UniF = unweighted UniFrac, w UniF = weighted UniFrac

P value: (-) indicates a negative association, (+) indicates a positive association

Transformation: Faiths PD is log transformed

Host biometrics: FL = fork length in mm, K = Fulton's condition factor

Environmental factors: Press = pressure, Sal = salinity, Temp = temperature

Shapiro: (Residual normality > 0.05)

Breusch-Pagan: (homoscedasticity > 0.05)
